# Supplementary material
Source: MDPI journal article supplement (https://www.mdpi.com/2311-7524/10/5/521)
Supplement: s1 [file s1]

**Table S1.** Validation characteristics data of the phenolic standards, and sensitivity of the HPLC-DAD approach.

| Phenolic compounds                   | Retention time (min) | R <sup>2</sup> <sup>a</sup> | Linear range (mg/mL) | LOD <sup>b</sup> (mg/mL) | LOQ <sup>c</sup> (mg/mL) |
|--------------------------------------|----------------------|-----------------------------|----------------------|--------------------------|--------------------------|
| Gallic acid                          | 2.210 ± 0.181        | 0.99                        | 0.2–1                | 0.02                     | 0.05                     |
| Catechin                             | 2.712 ± 0.008        | 0.99                        | 0.2–1                | 0.05                     | 0.16                     |
| 4-Hydroxybenzoic acid                | 3.040 ± 0.039        | 0.99                        | 0.2–1                | 0.01                     | 0.03                     |
| Vanillic acid                        | 3.193 ± 0.016        | 0.99                        | 0.2–1                | 0.03                     | 0.09                     |
| Caffeic acid                         | 4.134 ± 0.036        | 0.99                        | 0.2–1                | 0.01                     | 0.02                     |
| Syringic acid                        | 5.502 ± 0.470        | 0.99                        | 0.2–1                | 0.01                     | 0.03                     |
| 3-hydroxybenzoic acid                | 7.913 ± 0.438        | 0.99                        | 0.2–1                | 0.01                     | 0.05                     |
| <i>p</i> -Coumaric acid              | 9.106 ± 0.622        | 0.99                        | 0.2–1                | 0.02                     | 0.05                     |
| Sinapic acid                         | 10.221 ± 0.359       | 0.99                        | 0.2–1                | 0.03                     | 0.09                     |
| Ferulic acid                         | 10.931 ± 0.201       | 0.99                        | 0.2–1                | 0.02                     | 0.06                     |
| 3-hydroxyflavone                     | 12.080 ± 0.950       | 0.99                        | 0.2–1                | 0.02                     | 0.05                     |
| Salicylic acid                       | 13.837 ± 0.875       | 0.99                        | 0.2–1                | 0.03                     | 0.08                     |
| Rutin                                | 15.217 ± 0.203       | 0.99                        | 0.2–1                | 0.01                     | 0.04                     |
| Cinnamic acid                        | 16.109 ± 0.097       | 0.99                        | 0.2–1                | 0.02                     | 0.05                     |
| Quercetin 3- <i>O</i> -β-D-glucoside | 16.800 ± 0.101       | 0.99                        | 0.2–1                | 0.02                     | 0.07                     |
| 3-hydroxycinnamic acid               | 17.870 ± 0.498       | 0.99                        | 0.2–1                | 0.05                     | 0.08                     |
| Kaempferol                           | 21.994 ± 1.213       | 0.99                        | 0.2–1                | 0.03                     | 0.09                     |
| <i>trans</i> -chalcone               | 29.338 ± 0.274       | 0.99                        | 0.2–1                | 0.01                     | 0.04                     |

a, Correlation coefficients of the regression equation. b, LOD limit of detection. c, LOQ limit of quantification.
